# Supplementary material
Source: Research Square preprint supplement (doi:10.21203/rs.3.rs-9519310/v1)
Supplement: Supplementary file 1 [file d55e8ca5e8700ba246b6b0e7.docx]

Survey on Medication Safety among Older Adults in the Chengdu-Chongqing Region

Dear Grandfather/Grandmother,

We are conducting this survey to investigate the current status of medication safety among older adults in the Chengdu-Chongqing region and to optimize the pharmaceutical care system for the elderly population. This project is commissioned by the Chongqing Federation of Social Sciences and the Aging Department of the Chongqing Municipal Health Commission. This questionnaire is anonymous. Please feel free to respond based on your actual situation. Thank you for your valuable support.

**Section 1: Demographic Characteristics**

1. Region: ○ Chengdu ○Chongqing
2. Residence: ○Urban ○Rural

3. **Age:** ______ years old

4. Sex: ○ Male ○Female

5. Educational Level:

| ○No formal education ○Primary school ○Junior high school ○Senior high school ○Junior college ○Bachelor’s degree ○Graduate degree or above |
| --- |

6. Previous Occupation:

○Farmer ○Worker ○ Business owner ○Public institution employee ○Other (Please specify): ______

1. Monthly Income:

○＞5000 CNY ○3001-5000 CNY ○1001-3000 CNY ○ ≤1000 CNY

8. Diagnosed Chronic Conditions: [Select all that apply]

□Diabetes □Hypertension □Hyperlipidemia □Coronary Heart Disease (CHD) □Chronic Obstructive Pulmonary Disease (COPD) □Chronic Kidney Disease □Osteoporosis □Arthritis □Rheumatism □Cataract □Other(Please specify):_______

1. Number of Medications Taken Daily: ○0 ○1-4 ○5-9 ○≥10
2. **Have you ever received pharmaceutical care?**

○No ○Yes

**Section 2: Knowledge, Attitude, and Practice (KAP) Assessment of Medication Safety**

- 1. **Medication Knowledge**

Please indicate your level of understanding regarding the following statements:

| **Statements** | **Unaware** | **Partially aware** | **Fully aware** |
| --- | --- | --- | --- |
| Medications are classified as prescription-only (Rx) or over-the-counter (OTC). Prescription drugs require a doctor's prescription for purchase. | ○ | ○ | ○ |
| "Before meals" refers to 30 minutes prior to eating; "After meals" refers to 30 minutes post-meal; "Fasting" refers to 1 hour before or 2 hours after a meal. | ○ | ○ | ○ |
| Enteric-coated, sustained-release, and controlled-release tablets must not be crushed and should be swallowed whole. | ○ | ○ | ○ |
| Repackaged unit-dose medications from clinics typically have a shelf life of only 7 days. | ○ | ○ | ○ |
| Certain medications, such as probiotics and insulin, require refrigeration. | ○ | ○ | ○ |

- 1. **Medication Attitudes**

Please indicate your level of agreement with the following statements:

| **Statements** | **Disagree** | **Uncertain** | **Agree** |
| --- | --- | --- | --- |
| Intravenous therapy carries higher risks than oral medication for similar efficacy; oral administration is preferred over injection when possible. | ○ | ○ | ○ |
| Herbal medicines and Chinese patent medicines are not necessarily safer than Western pharmaceuticals. | ○ | ○ | ○ |
| Dietary supplements (Health products) cannot treat diseases and should not be used as substitutes for medication. | ○ | ○ | ○ |
| Medications effective for peers may not be suitable for me; I should not follow recommendations from other patients. | ○ | ○ | ○ |
| Chronic conditions require lifelong medication; discontinuation may cause significant physical harm. | ○ | ○ | ○ |

- 1. **Medication-taking Practices**

How often do you engage in the following practices?

| **Practices** | **Never** | **Occasionally** | **Frequently** |
| --- | --- | --- | --- |
| I take medications irregularly, often forgetting doses or taking them only when I remember. | ○ | ○ | ○ |
| I increase the dosage or switch medications on my own if the therapeutic effect is not immediately apparent. | ○ | ○ | ○ |
| I use milk, beverages, tea, or congee to swallow my medications. | ○ | ○ | ○ |
| I prefer visiting local clinics or purchasing drugs directly from pharmacies to avoid the inconvenience of hospital registration. | ○ | ○ | ○ |
| I purchase antibiotics (e.g., Amoxicillin, Cefixime, Levofloxacin) as general anti-inflammatory drugs and stop taking them immediately once symptoms improve. | ○ | ○ | ○ |
